# Supplementary material for: Height-dependent differential rotation of the solar atmosphere detected by CHASE
Source: Springer Nature journal article supplement (doi:10.1038/s41550-024-02299-4), 2024-06-13
Supplement: 41550_2024_2299_MOESM1_ESM.pdf [file 41550_2024_2299_MOESM1_ESM.pdf]

---

# Height-dependent differential rotation of the solar atmosphere detected by CHASE

---

In the format provided by the authors and unedited

---

## Supplementary Figure

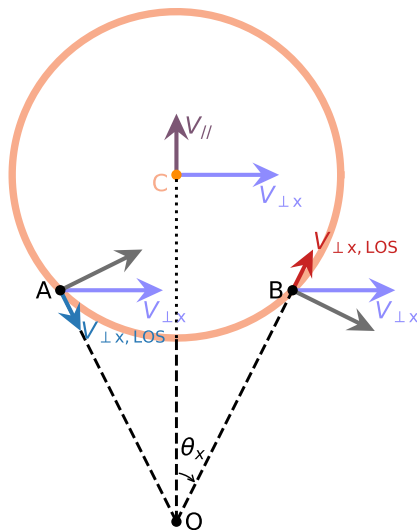

**Fig. 1** A top-view sketch showing how the fake Doppler signal is introduced by the relative speed of the satellite to the Sun. “O” marks the position of the satellite, “C” is the centroid of the Sun. “A” and “B” mark the two positions on the eastern and western hemispheres, respectively. The quantity  $v_{\parallel}$  is the line-of-sight component of relative speed of the satellite to the Sun. For the perpendicular component, only  $v_{\perp x}$  is shown since the y-direction is perpendicular to the plane. The Sun moves rightward relative to the satellite with a speed of  $v_{\perp x}$ , which is projected to the line of sight as  $v_{\perp x, LOS}$ . It shows a blueshift at point “A” and a redshift at “B”.

001  
002  
003  
004  
005  
006  
007  
008  
009  
010  
011  
012  
013  
014  
015  
016  
017  
018  
019  
020  
021  
022  
023  
024  
025  
026  
027  
028  
029  
030  
031  
032  
033  
034  
035  
036  
037  
038  
039  
040  
041  
042  
043  
044  
045  
046
